# Supplementary material for: Sonochemical synthesis of copper hydride (CuH)
Source: Royal Society of Chemistry journal article supplement (doi:10.1039/c2cc15741a), 2011-12-19
Supplement: c2cc15741a.pdf [file c2cc15741a.pdf]

## Supporting Information

# Sonochemical Synthesis of Copper Hydride (CuH)

Panitat Hasin, Yiyang Wu\*

*Department of Chemistry & Biochemistry, The Ohio State University, 100 West 18th Avenue, Columbus, Ohio 43210*

### Determining the impurity phase in the CuH product

Fig. S-1 below shows the X-ray diffraction (XRD) pattern of the sonochemistry product, as well as the JCPDS files of CuO, Cu<sub>2</sub>O, and Cu. The impurity shoulder peak at 40 degree cannot be assigned to any of these copper substances.

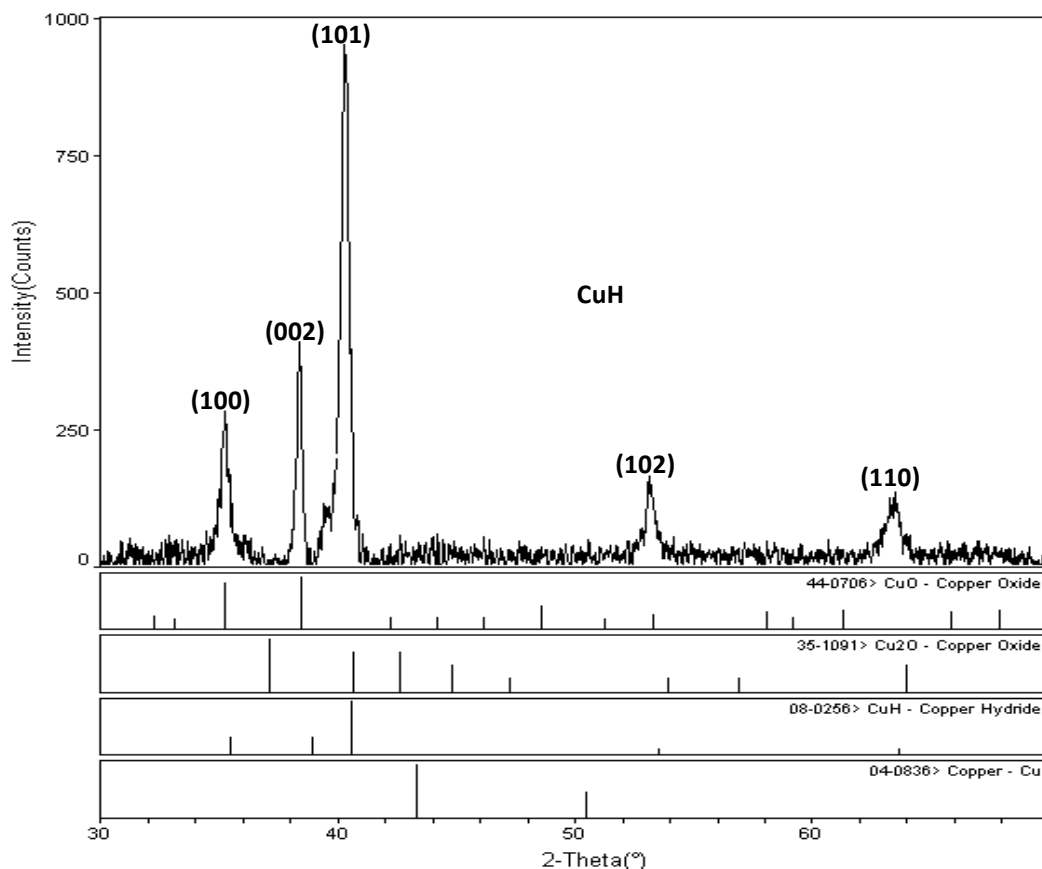

**Fig. S-1.** XRD pattern of the sonochemistry product.

X-ray photoelectron spectroscopy (XPS) was also performed in order to determine the impurity in the sample. The survey spectrum only shows four elements:

Cu, Ti, O and C. Fig. S-2 shows the Ti 2p XPS pattern of the CuH product. The Ti  $2p_{3/2}$  and Ti  $2p_{1/2}$  peaks at 457 and 463 eV, respectively are attributed to  $Ti^{4+}$ . Combining the XRD and XPS results, we think the impurity in the CuH product should be  $TiO_2$ .

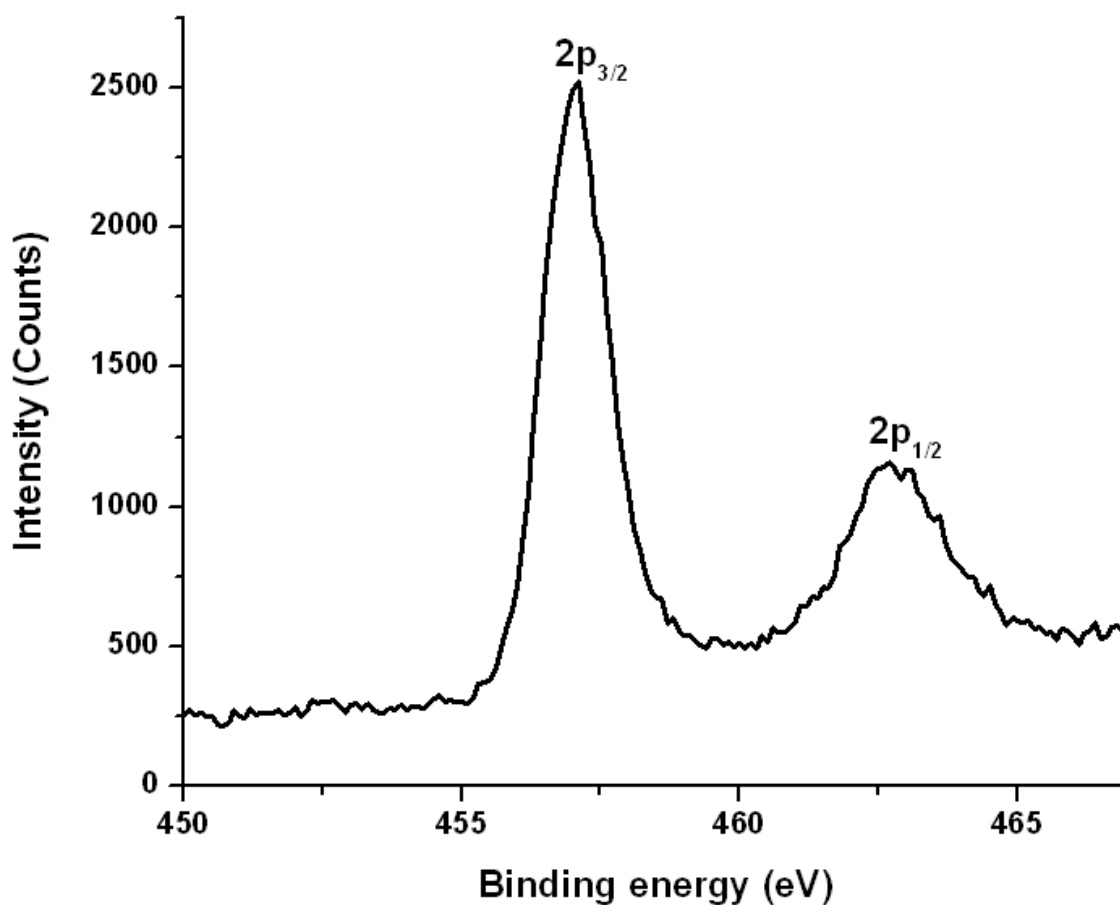

**Fig. S-2.** Ti 2p XPS spectrum of CuH.

In order to check if  $TiO_2$  is a normal contamination in the sonochemical syntheses, we carried out the synthesis of gold nanoparticles by sonochemistry. As can be seen from Fig. S-3, the impurity peak at around 40 degree also appears in the XRD spectrum in addition to the Au peaks. We have also used a horn sonicator in another lab and obtained the same results. These experiments show that  $TiO_2$  is a normal contamination in our sonochemical syntheses.

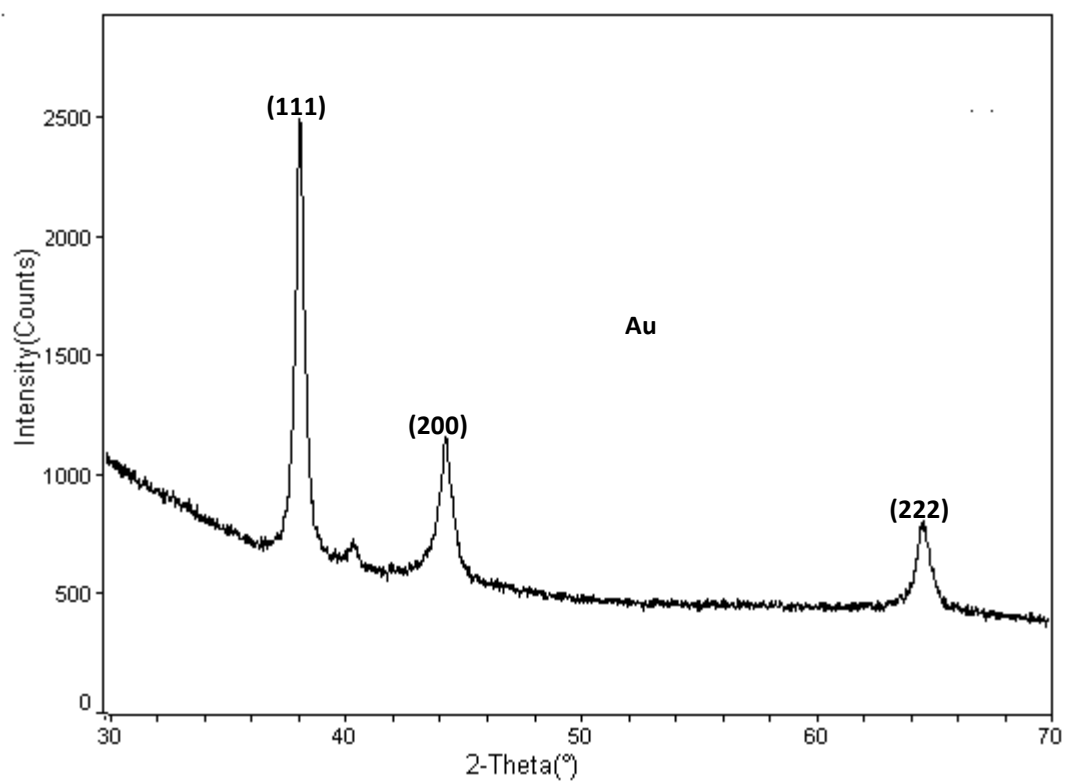

**Fig. S-3.** XRD pattern of Au prepared by sonochemistry.
